# Supplementary material
Source: PubMed Central journal article supplement (PMC3310309)

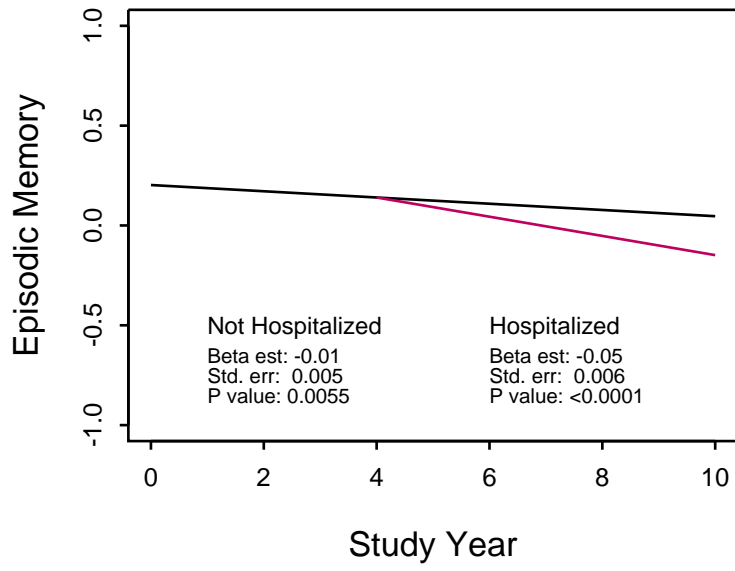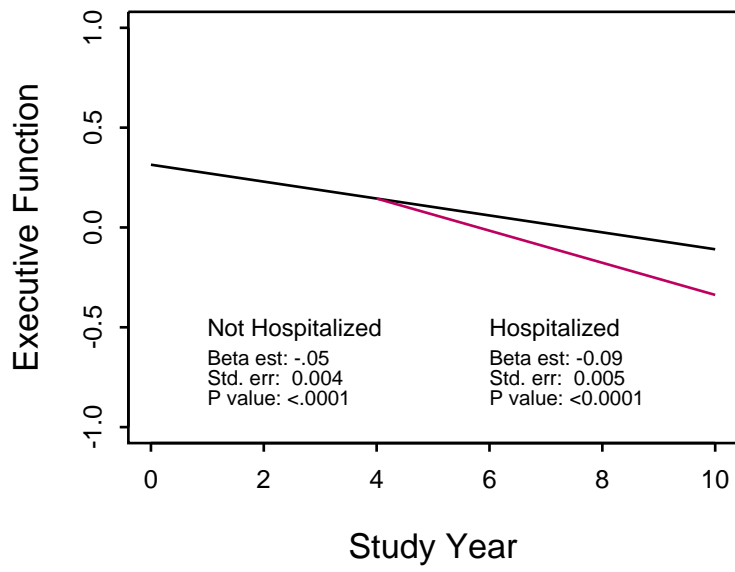

Supplement: supp_WNL.0b013e31824d5894_WNL203561-Figure__e-1__11.17.11.pdf [file supp_WNL.0b013e31824d5894_WNL203561-Figure__e-1__11.17.11.pdf]

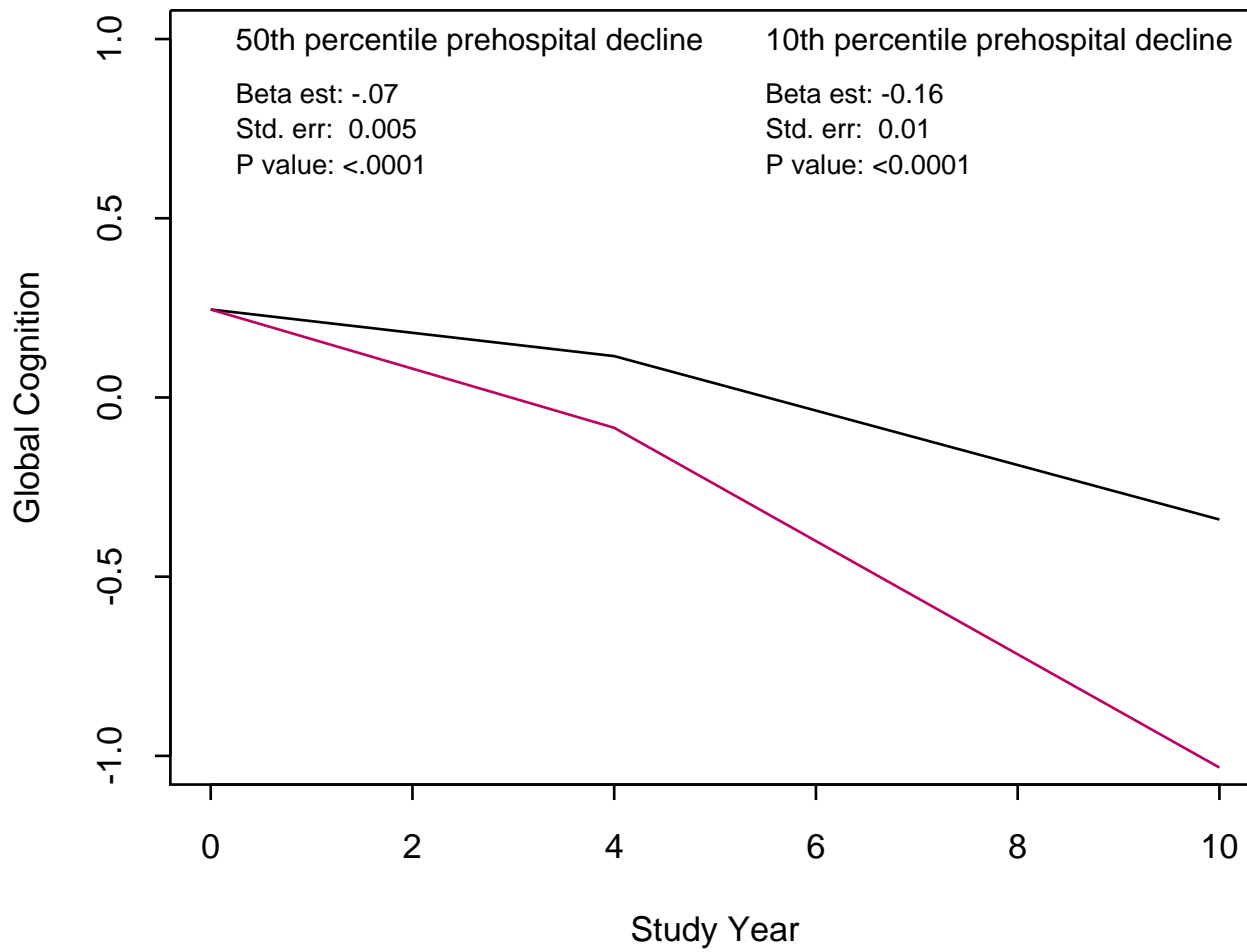

Supplement: supp_WNL.0b013e31824d5894_WNL203561-Figure_e-2___11.17.11.pdf [file supp_WNL.0b013e31824d5894_WNL203561-Figure_e-2___11.17.11.pdf]

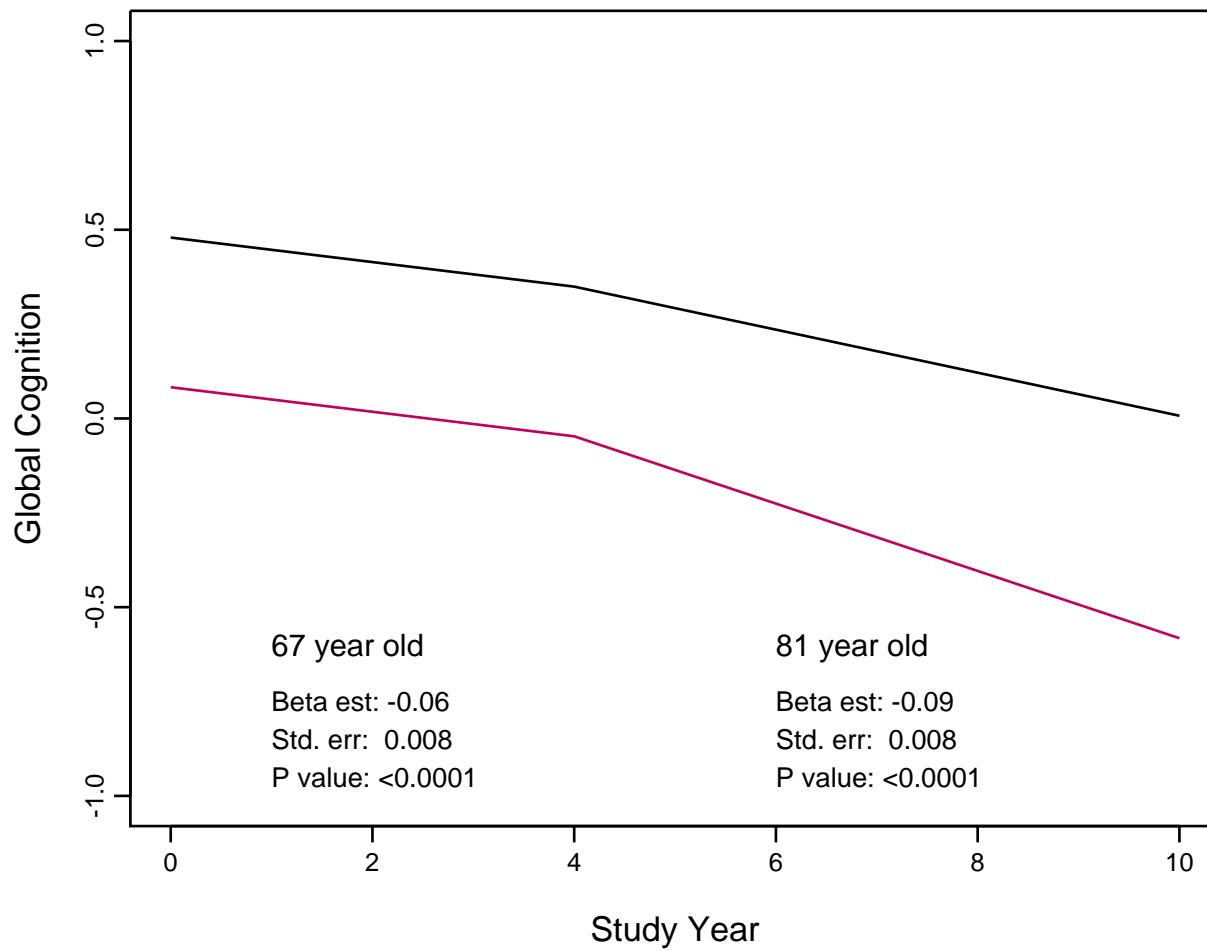

Supplement: supp_WNL.0b013e31824d5894_WNL203561-Figure_e-3__11.17.11.pdf [file supp_WNL.0b013e31824d5894_WNL203561-Figure_e-3__11.17.11.pdf]
